# Supplementary material
Source: bioRxiv or medRxiv preprint supplement (https://medrxiv.org/highwire/filestream/92458/field_highwire_adjunct_files/0/2020.08.06.20169367-1.pdf)
Supplement: Supplementary file [file 2020.08.06.20169367-1.pdf]

**Supplementary Table 1:** Additional demographic and medical data.

|                                     | <b>Asymptomatic<br/>(N=7)</b> | <b>Symptomatic<br/>Non-Hospitalized<br/>(N=22)</b> | <b>Symptomatic<br/>Hospitalized<br/>(N=5)</b> | <b>Overall<br/>(N=34)</b> |
|-------------------------------------|-------------------------------|----------------------------------------------------|-----------------------------------------------|---------------------------|
| <b>Race</b>                         |                               |                                                    |                                               |                           |
| AIAN                                | 1 (14.3%)                     | 0 (0%)                                             | 0 (0%)                                        | 1 (2.9%)                  |
| White                               | 6 (85.7%)                     | 21 (95.5%)                                         | 1 (20.0%)                                     | 28 (82.4%)                |
| Asian                               | 0 (0%)                        | 1 (4.5%)                                           | 3 (60.0%)                                     | 4 (11.8%)                 |
| Black                               | 0 (0%)                        | 0 (0%)                                             | 0 (0%)                                        | 0 (0%)                    |
| Multiple Races                      | 0 (0%)                        | 0 (0%)                                             | 1 (20.0%)                                     | 1 (2.9%)                  |
| <b>Hispanic</b>                     | 0 (0%)                        | 1 (4.5%)                                           | 0 (0%)                                        | 1 (2.9%)                  |
| <b>Smoking</b>                      |                               |                                                    |                                               |                           |
| Nonsmoker                           | 6 (85.7%)                     | 20 (90.9%)                                         | 5 (100%)                                      | 31 (91.4%)                |
| Tobacco use                         | 1 (14.3%)                     | 2 (9.1%)                                           | 0 (0%)                                        | 3 (8.8 %)                 |
| Electronic cigarettes/vapor pen use | 0 (0%)                        | 1 (4.5%)                                           | 0 (0%)                                        | 1 (2.9%)                  |
| <b>Comorbidities<sup>a</sup></b>    |                               |                                                    |                                               |                           |
| No comorbidities                    | 6 (85.7%)                     | 20 (90.9%)                                         | 3 (60.0%)                                     | 29 (82.9%)                |
| Asthma                              | 0 (0%)                        | 0 (0%)                                             | 1 (20.0%)                                     | 1 (2.9%)                  |
| Hypertension                        | 0 (0%)                        | 2 (9.1%)                                           | 1 (20.0%)                                     | 3 (8.8%)                  |
| Diabetes                            | 0 (0%)                        | 0 (0%)                                             | 1 (20.0%)                                     | 1 (2.9%)                  |
| COPD/emphysema                      | 0 (0%)                        | 0 (0%)                                             | 1 (20.0%)                                     | 1 (2.9%)                  |
| Cancer                              | 1 (14.3%)                     | 0 (0%)                                             | 1 (20.0%)                                     | 2 (5.9%)                  |
| Obstructive Sleep Apnoea            | 0 (0%)                        | 0 (0%)                                             | 1 (20.0%)                                     | 1 (2.9%)                  |
| <b>Common Symptoms<sup>a</sup></b>  |                               |                                                    |                                               |                           |
| Chills or shivering                 | 0 (0%)                        | 14 (63.6%)                                         | 5 (100%)                                      | 19 (55.9%)                |
| Cough                               | 0 (0%)                        | 16 (72.7%)                                         | 5 (100%)                                      | 21 (61.8%)                |
| Diarrhea                            | 0 (0%)                        | 6 (27.3%)                                          | 1 (20.0%)                                     | 7 (20.6%)                 |
| Ear pain or ear discharge           | 0 (0%)                        | 1 (4.5%)                                           | 0 (0%)                                        | 1 (2.9%)                  |
| Fatigue                             | 0 (0%)                        | 17 (77.3%)                                         | 1 (20.0%)                                     | 18 (52.9%)                |
| Feeling feverish                    | 0 (0%)                        | 13 (59.1%)                                         | 5 (100%)                                      | 18 (52.9%)                |
| Increased trouble                   | 0 (0%)                        | 5 (22.7%)                                          | 5 (100%)                                      | 10 (29.4%)                |

|                                                        |             |             |                   |                   |
|--------------------------------------------------------|-------------|-------------|-------------------|-------------------|
| breathing                                              |             |             |                   |                   |
| Loss of sense of taste or smell                        | 0 (0%)      | 7 (31.8%)   | 0 (0%)            | 7 (20.6%)         |
| Muscle or body aches                                   | 0 (0%)      | 14 (63.6%)  | 2 (40.0%)         | 16 (47.1%)        |
| Nausea or vomiting                                     | 0 (0%)      | 3 (13.6%)   | 2 (40.0%)         | 5 (14.7%)         |
| Rash                                                   | 0 (0%)      | 1 (4.5%)    | 0 (0%)            | 1 (2.9%)          |
| Runny or stuffy nose                                   | 0 (0%)      | 13 (59.1%)  | 1 (20.0%)         | 14 (41.2%)        |
| Sore throat or itchy/scratchy throat                   | 0 (0%)      | 10 (45.5%)  | 0 (0%)            | 10 (29.4%)        |
| Sweats                                                 | 0 (0%)      | 13 (59.1%)  | 4 (80.0%)         | 17 (50.0%)        |
| <b>Highest Level of Medical Treatment Received</b>     |             |             |                   |                   |
| Outpatient - Testing Only                              | 6 (85.7%)   | 14 (63.6%)  | 0 (0%)            | 20 (58.8%)        |
| Outpatient - Saw Provider <sup>b</sup>                 | 1 (14.3%)   | 8 (36.4%)   | 0 (0%)            | 9 (26.5%)         |
| Inpatient (General Floor)                              | 0 (0%)      | 0 (0%)      | 2 (40.0%)         | 2 (5.9%)          |
| Inpatient (ICU)                                        | 0 (0%)      | 0 (0%)      | 3 (60.0%)         | 3 (8.9%)          |
| <b>Highest Level of Respiratory Support</b>            |             |             |                   |                   |
| None                                                   | 7 (100%)    | 22 (100%)   | 0 (0%)            | 29 (85.3%)        |
| Nasal Cannula                                          | 0 (0%)      | 0 (0%)      | 1 (20.0%)         | 1 (2.9%)          |
| High-flow O2 or non-rebreather                         | 0 (0%)      | 0 (0%)      | 1 (20.0%)         | 1 (2.9%)          |
| Non-invasive ventilation (BiPAP)                       | 0 (0%)      | 0 (0%)      | 1 (20.0%)         | 1 (2.9%)          |
| Mechanical Ventilation                                 | 0 (0%)      | 0 (0%)      | 2 (40.0%)         | 2 (5.9%)          |
| <b>Duration of mechanical ventilation (days) (N=2)</b> |             |             |                   |                   |
| Median [Min, Max]                                      | NA [NA, NA] | NA [NA, NA] | 11.5 [6.00, 17.0] | 11.5 [6.00, 17.0] |

<sup>a</sup>Categories not mutually exclusive

<sup>b</sup>Includes Primary care physician, Urgent care, Emergency Department

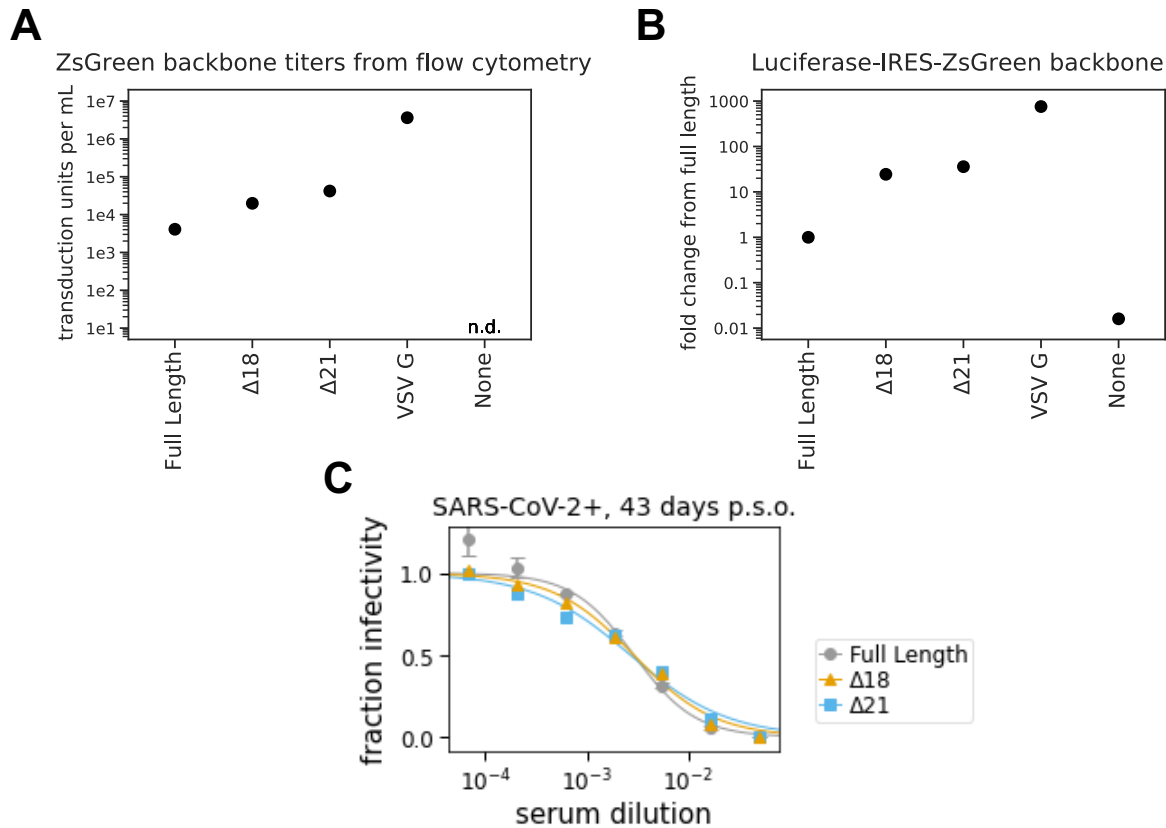

**Supplementary Figure 1.** Titers of spike-pseudotyped lentiviral particles in 293T-ACE2 cells (BEI Resources, NR-52511) (**A**, **B**) and neutralization of these viruses with serum from an individual previously infected with SARS-CoV-2 (**C**). **A**) Titers of pseudotyped lentivirus with a ZsGreen backbone (BEI, NR-52520) pseudotyped with full-length spike (BEI, NR-52514), spike with either the last 18 ( $\Delta 18$ ) or 21 ( $\Delta 21$ ) amino acids truncated, VSV G, or no viral entry protein. Titers were determined as described in [1]. Positive cells were counted via flow cytometry at 60 h post-infection. The “n.d.” indicates that the titer was not detectable. Data shown are from a single representative example. **B**) Titers of Luciferase-IRES-ZsGreen backbone virus pseudotyped with the specified viral entry proteins. Titers were determined by measuring relative luciferase units (RLUs) per mL and then normalizing to the titers of full-length spike pseudotyped lentivirus. RLUs were determined at 52 h post-infection. The RLUs per mL for the spike-pseudotyped viruses are the average of seven wells of a 1:3 dilution of virus in a total volume of 150  $\mu$ L. For the VSV G-pseudotyped virus, RLUs per mL were averaged from six three-fold dilutions starting at a 1:48 dilution in a total volume of 150  $\mu$ L. **C**) Neutralization assay with serum collected from an individual previously infected with SARS-CoV-2, 43 days post-symptom onset (p.s.o.). The full-length neutralization curve shows data averaged from duplicate measurements. The  $\Delta 18$  and  $\Delta 21$  neutralization curves display data from a single replicate. The IC<sub>50</sub>s for the full-length,  $\Delta 18$ , and  $\Delta 21$  viruses are 1:345, 1:345, and 1:370, respectively. These values all fall within the range of IC<sub>50</sub> values we have measured previously for this same serum sample with virus pseudotyped with full-length spike (1:320-1:375). We thank Dr. David Koelle and Dr. Anna Wald at the University of Washington for sharing this sample with us.

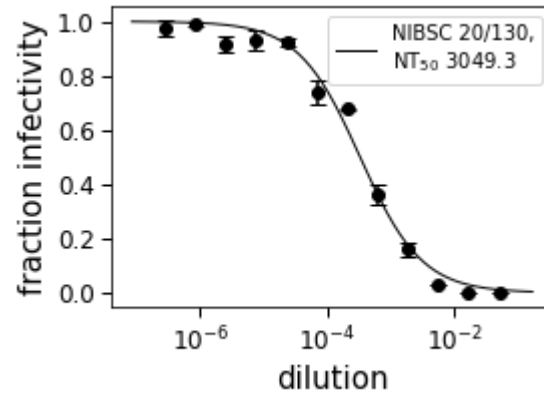

**Supplementary Figure 2:** Neutralization curve for NIBSC standard reference serum (product number 20/130). The  $NT_{50}$  for this sample was calculated to be ~3050.

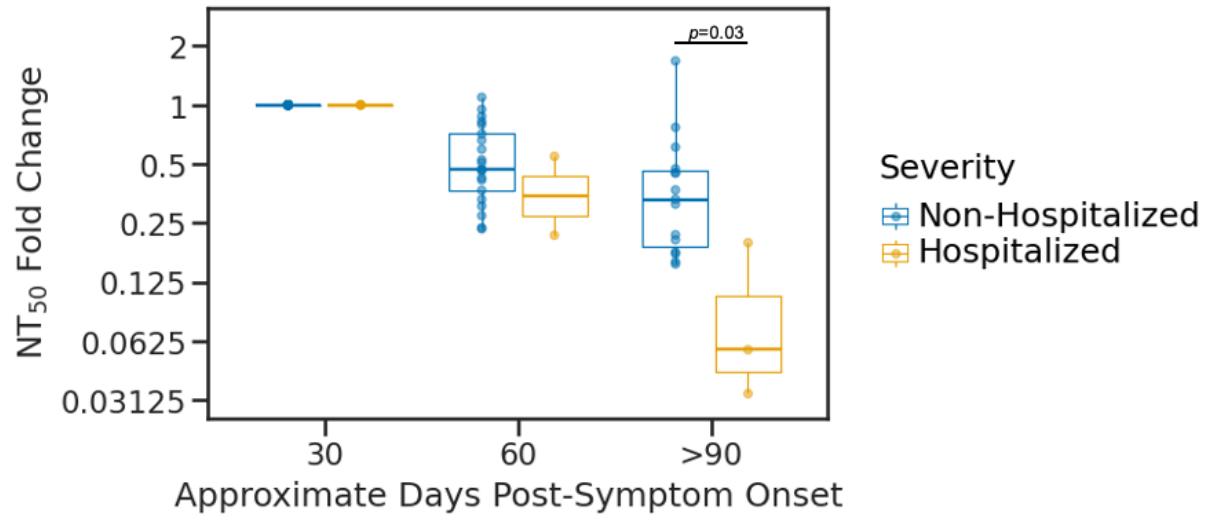

**Supplementary Figure 3:** Fold change in IC<sub>50</sub> at each timepoint colored by disease severity. There was only one asymptomatic individual with a 30-day timepoint and 90-day timepoint, so this individual was included in the “Non-Hospitalized” group. Only individuals with a sample with a reciprocal IC<sub>50</sub> of >20 at ~30 days post-symptom onset are included. *P*-value calculated using the Wilcoxon rank-sum test.

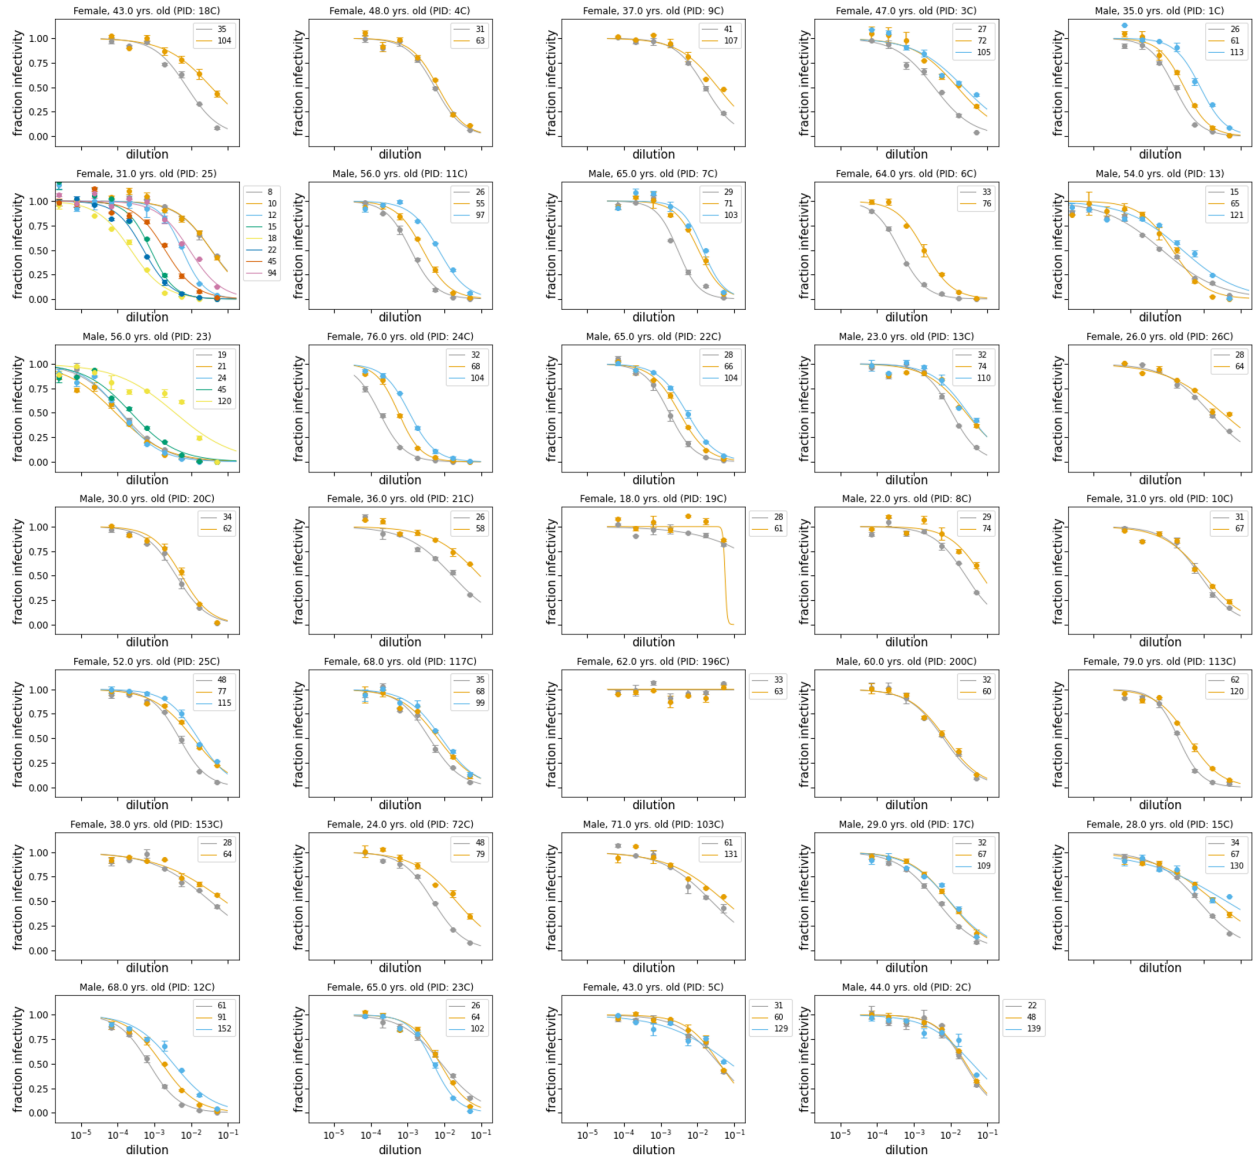

**Supplementary Figure 4:** Neutralization curves for each participant. For each participant, each sample is a different color with the legend specifying how many days post-symptom onset each sample was collected.

**Supplementary File 1:** Plasmid map for the spike plasmid (HDM\_Spikedelta21) used in the pseudotyped lentivirus neutralization assays.

**Supplementary File 2:** Raw data for each sample. This csv includes the columns: sample, participant ID, Sex, Age, Severity, Days Post-Symptom Onset, IC50, NT50, RBD IgA, RBD IgG, RBD IgM, and Spike IgG. ELISA results are presented as area under the curve (AUC).

**References:**

1. Crawford KHD, Eguia R, Dingens AS, et al. Protocol and Reagents for Pseudotyping Lentiviral Particles with SARS-CoV-2 Spike Protein for Neutralization Assays. *Viruses* [Internet]. **2020**; 12(5). Available from: <http://dx.doi.org/10.3390/v12050513>
